# Supplementary material
Source: PubMed Central journal article supplement (PMC4032111)
Supplement: NIHMS58599-supplement-Supplementary_Table.pdf [file NIHMS58599-supplement-Supplementary_Table.pdf]

## Supplementary Material

Table S1. Dogs that participated in the study.

| Breed group                | Breed                            | Age (years) | Sex       | Test order <sup>†</sup> | Rewarded location |
|----------------------------|----------------------------------|-------------|-----------|-------------------------|-------------------|
| Sheep dogs                 | Australian shepherd              | 3           | Male      | OA/OP                   | Left              |
|                            | Border collie                    | 4           | Male      | OP/OA                   | Left              |
|                            | Border collie                    | 4           | Male      | OA/OP                   | Right             |
|                            | Australian shepherd              | 3           | Male      | OP/OA                   | Right             |
|                            | Border collie                    | 2           | Female    | OP/OA                   | Left              |
|                            | Australian kelpie                | 1           | Female    | OA/OP                   | Right             |
|                            | Shetland sheepdog                | 3           | Female    | OP/OA                   | Right             |
|                            | Shetland sheepdog                | 5           | Female    | OA/OP                   | Left              |
| Retrievers                 | Labrador retriever               | 7           | Male      | OP/OA                   | Right             |
|                            | Golden retriever                 | 3           | Male      | OA/OP                   | Left              |
|                            | Golden retriever                 | 5           | Male      | excluded*               |                   |
|                            | Labrador retriever               | 5           | Male      | excluded*               |                   |
|                            | Golden retriever                 | 3           | Male      | excluded*               |                   |
|                            | Golden retriever                 | 2           | Female    | OP/OA                   | Left              |
|                            | Flat-coated retriever            | 4           | Female    | OP/OA                   | Right             |
|                            | Golden retriever                 | 4           | Female    | OP/OA                   | Left              |
|                            | Golden retriever                 | 7           | Female    | OA/OP                   | Right             |
|                            | Golden retriever                 | 1           | Female    | OA/OP                   | Left              |
| Companion-<br>and Toy dogs | Chinese crested dog              | 2           | Female    | OP/OA                   | Left              |
|                            | Standard Poodle                  | 4           | Female    | excluded*               |                   |
|                            | Standard Poodle                  | 4           | Male      | excluded*               |                   |
|                            | Havanese dog                     | 3           | Male      | excluded*               |                   |
| Mongrels                   | Ibizan hound/Pointer             | 4           | Male      | OA/OP                   | Right             |
|                            | Border collie/German shepherd    | 5           | Male      | OP/OA                   | Left              |
|                            | Border collie/Labrador retriever | 3           | Male      | OP/OA                   | Right             |
|                            | Doberman mongrel                 | 3           | Female    | OP/OA                   | Right             |
|                            | Labrador retriever mongrel       | 3           | Female    | OP/OA                   | Left              |
|                            | Terrier mongrel                  | 1           | Female    | OA/OP                   | Right             |
|                            | Mongrel                          | 2           | Female    | OA/OP                   | Left              |
|                            | Border terrier mongrel           | 2           | Female    | OA/OP                   | Left              |
|                            | Mongrel                          | 1           | Female    | excluded*               |                   |
| Mongrel                    | 4                                | Female      | excluded* |                         |                   |

<sup>†</sup>OA: owner absent; OP: owner present

\* did not reach criterion during training or for refreshers
